# Supplementary material for: Evictions and Infant and Child Health Outcomes: A Systematic Review
Source: PubMed Central journal article supplement (PMC10091158; doi:10.1001/jamanetworkopen.2023.7612), 2023-04-11
Supplement: jamanetwopen-e237612-s002.pdf [file jamanetwopen-e237612-s002.pdf]

## Data Sharing Statement

Ramphal. Evictions and Infant and Child Health Outcomes. *JAMA Netw Open*. Published April 11, 2023. doi:10.1001/jamanetworkopen.2023.7612

### Data

**Data available:** No

### Additional Information

**Explanation for why data not available:** There is no data for this study.
